# Supplementary material for: Neotropical Bats: Estimating Species Diversity with DNA Barcodes
Source: PubMed Central journal article supplement (PMC3144236; doi:10.1371/journal.pone.0022648), 2011-07-26
Supplement: pone.0022648.s002.pdf [file pone.0022648.s002.pdf]

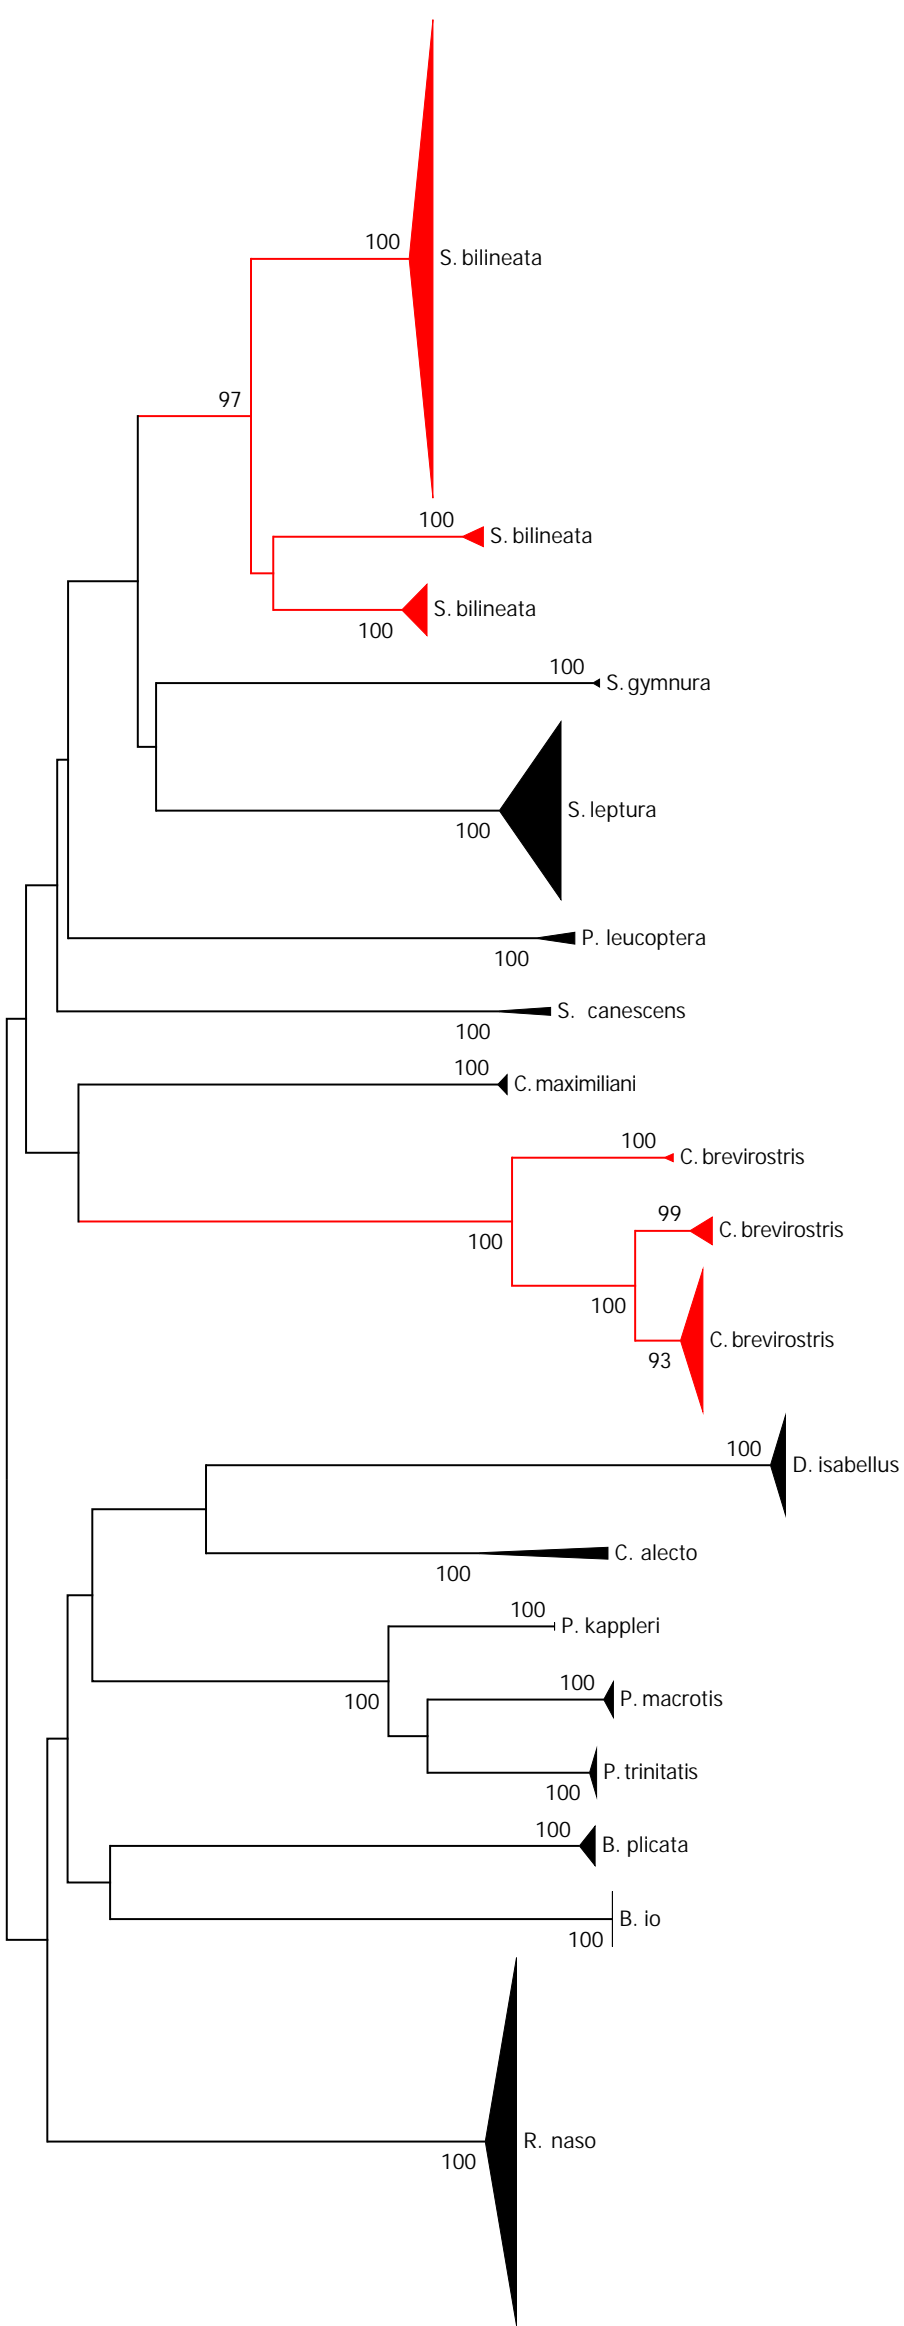

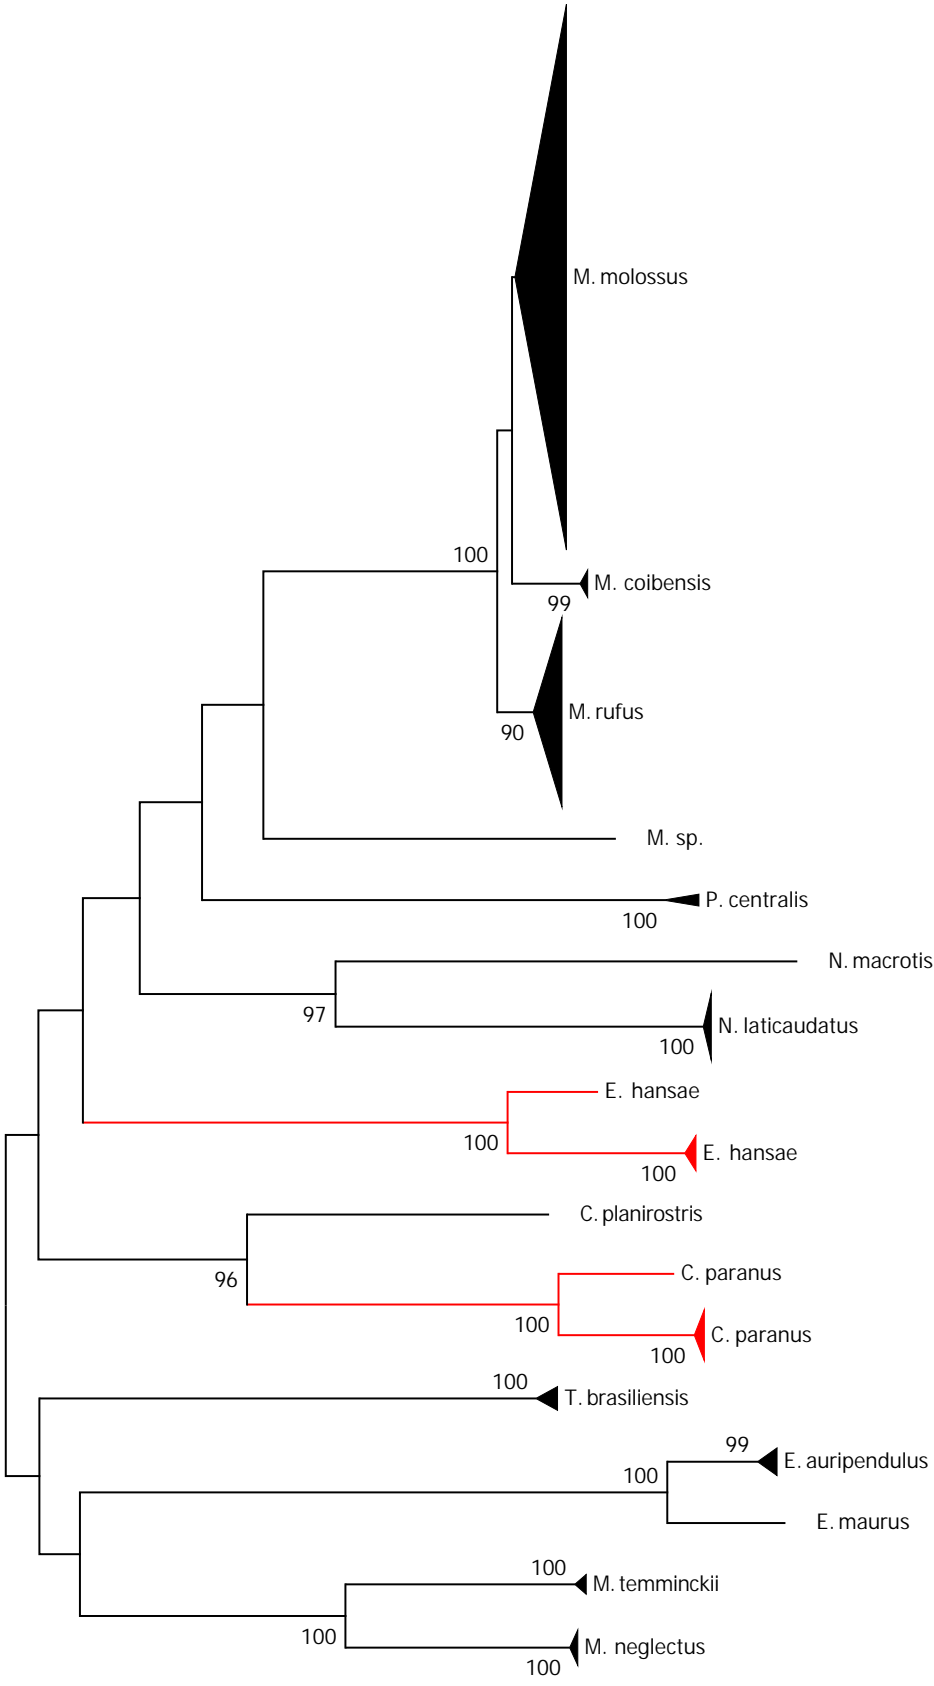

0.02

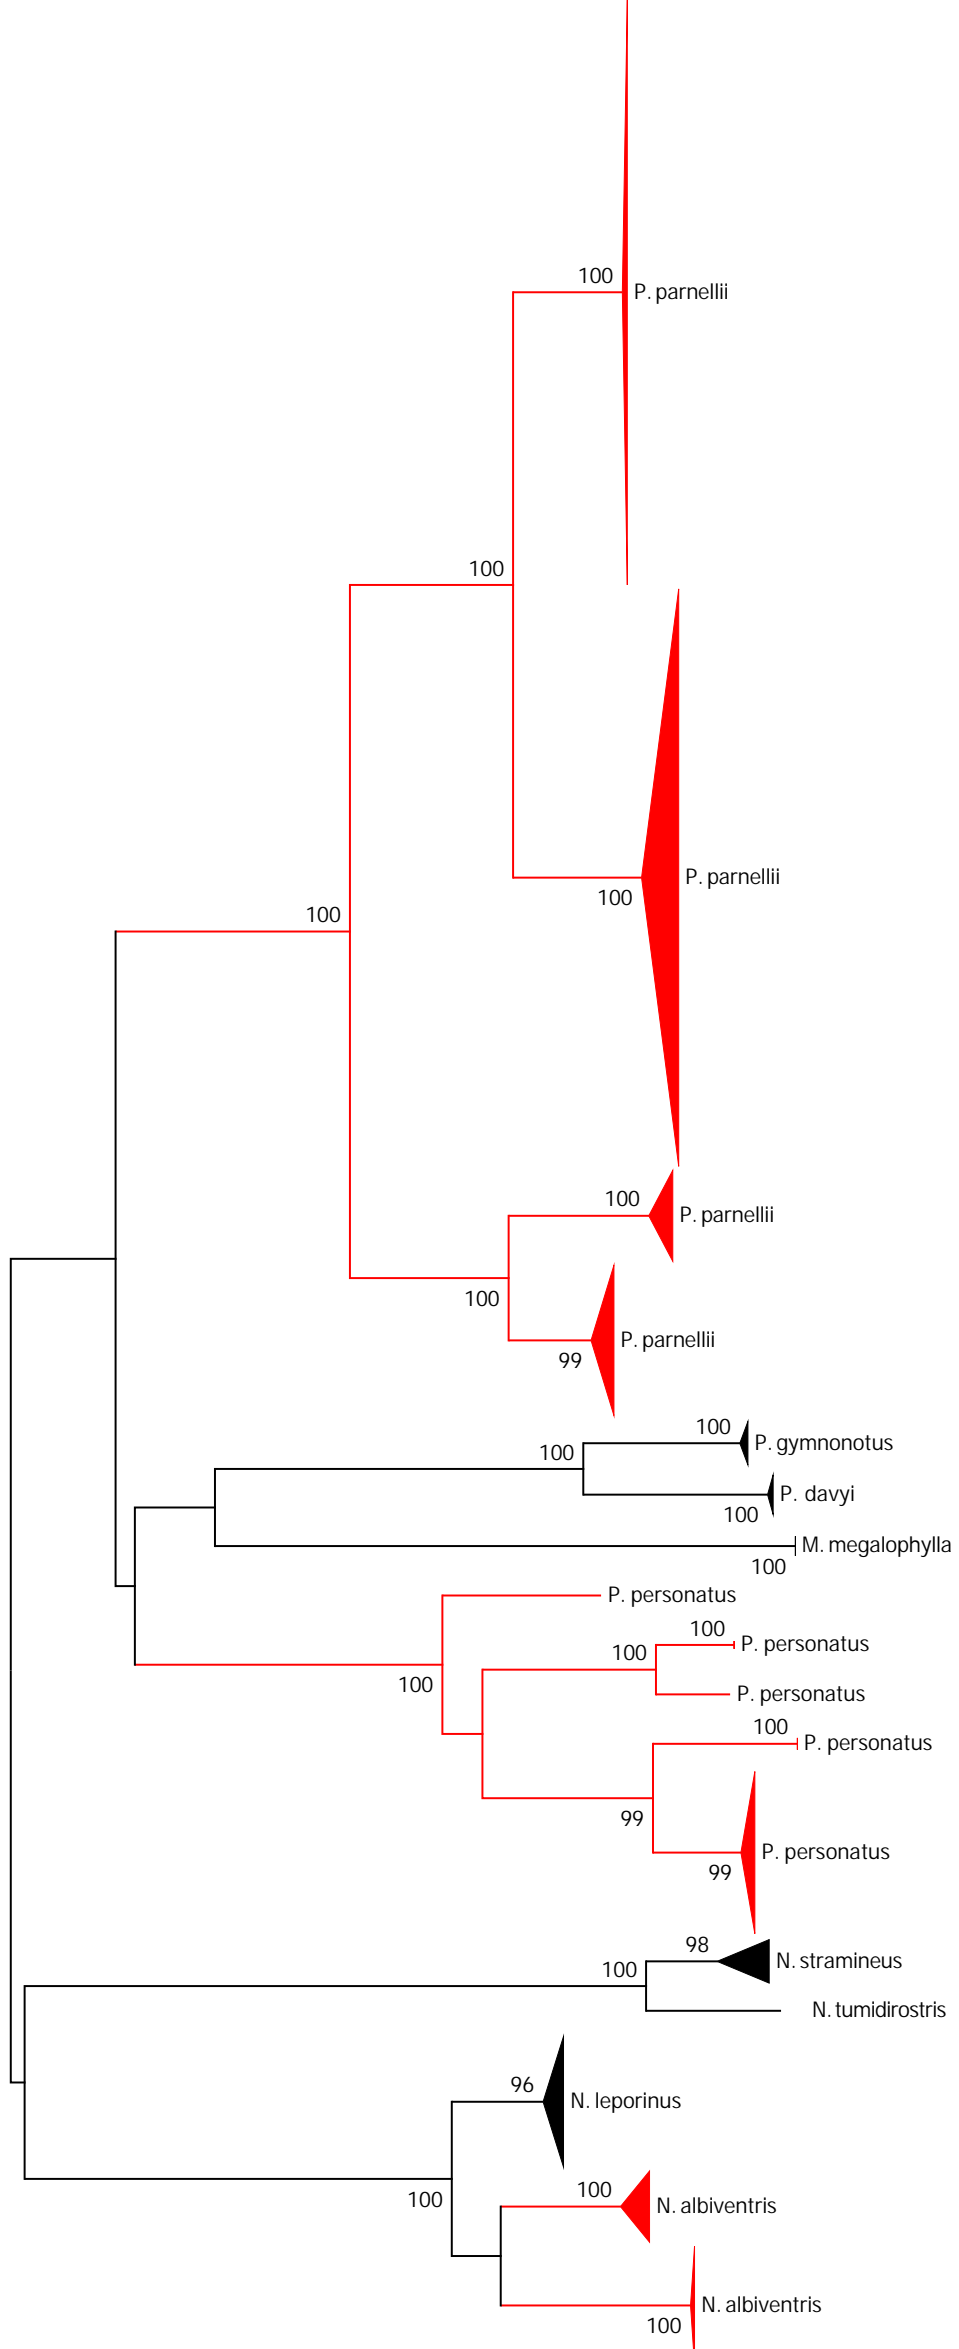

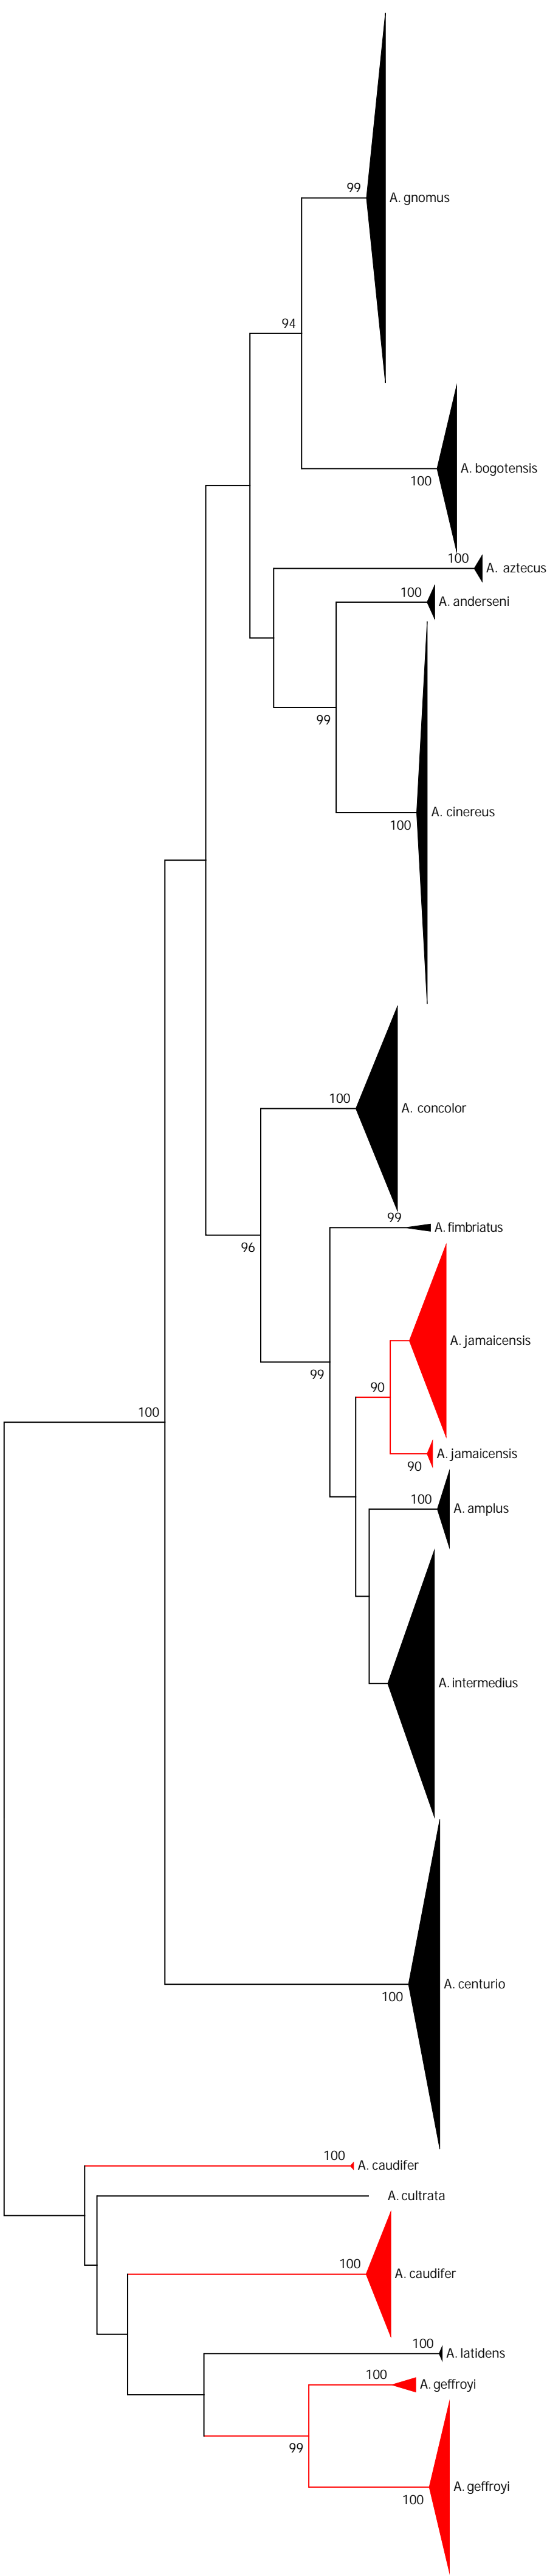

0.02

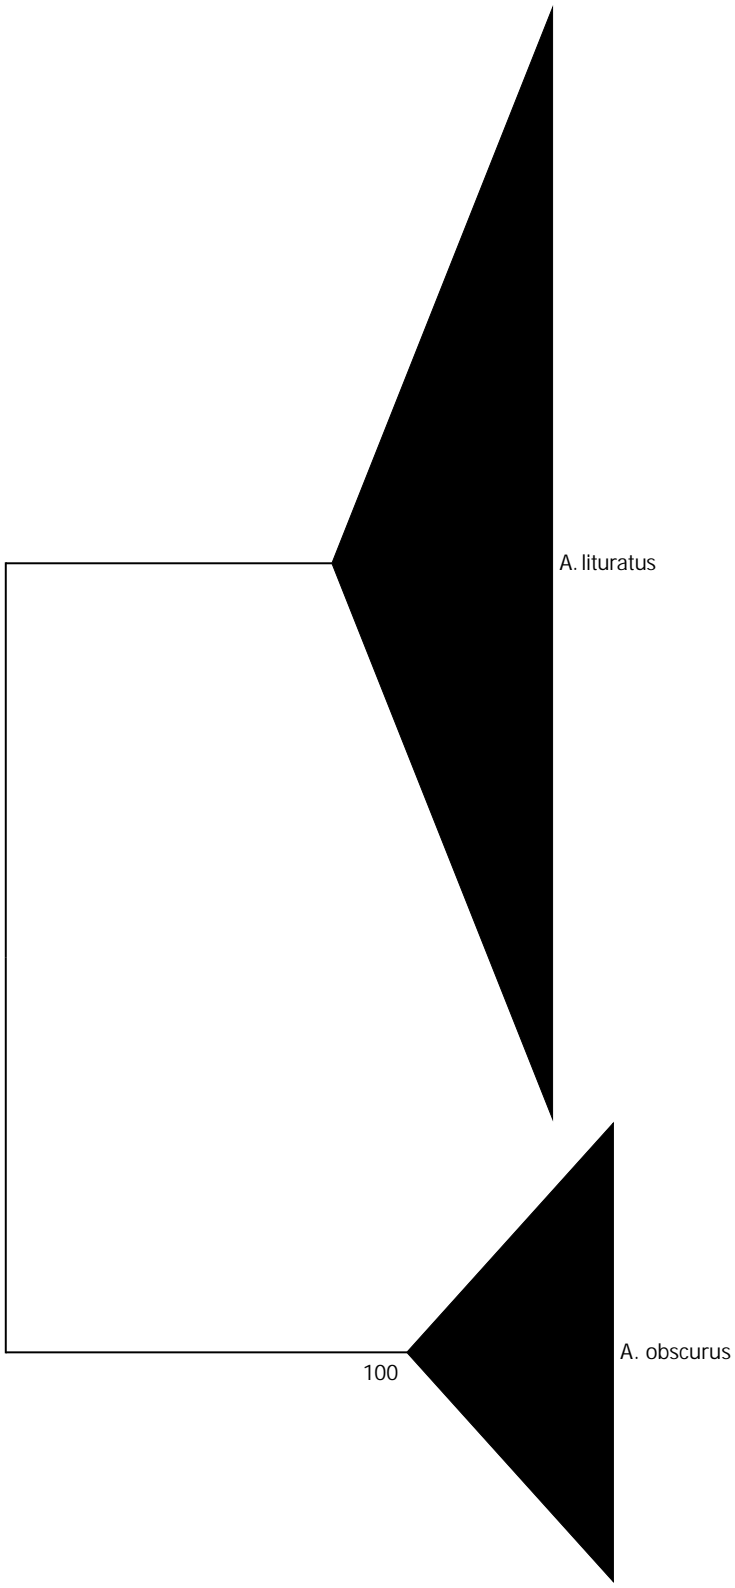

A. lituratus

A. obscurus

100

0.005

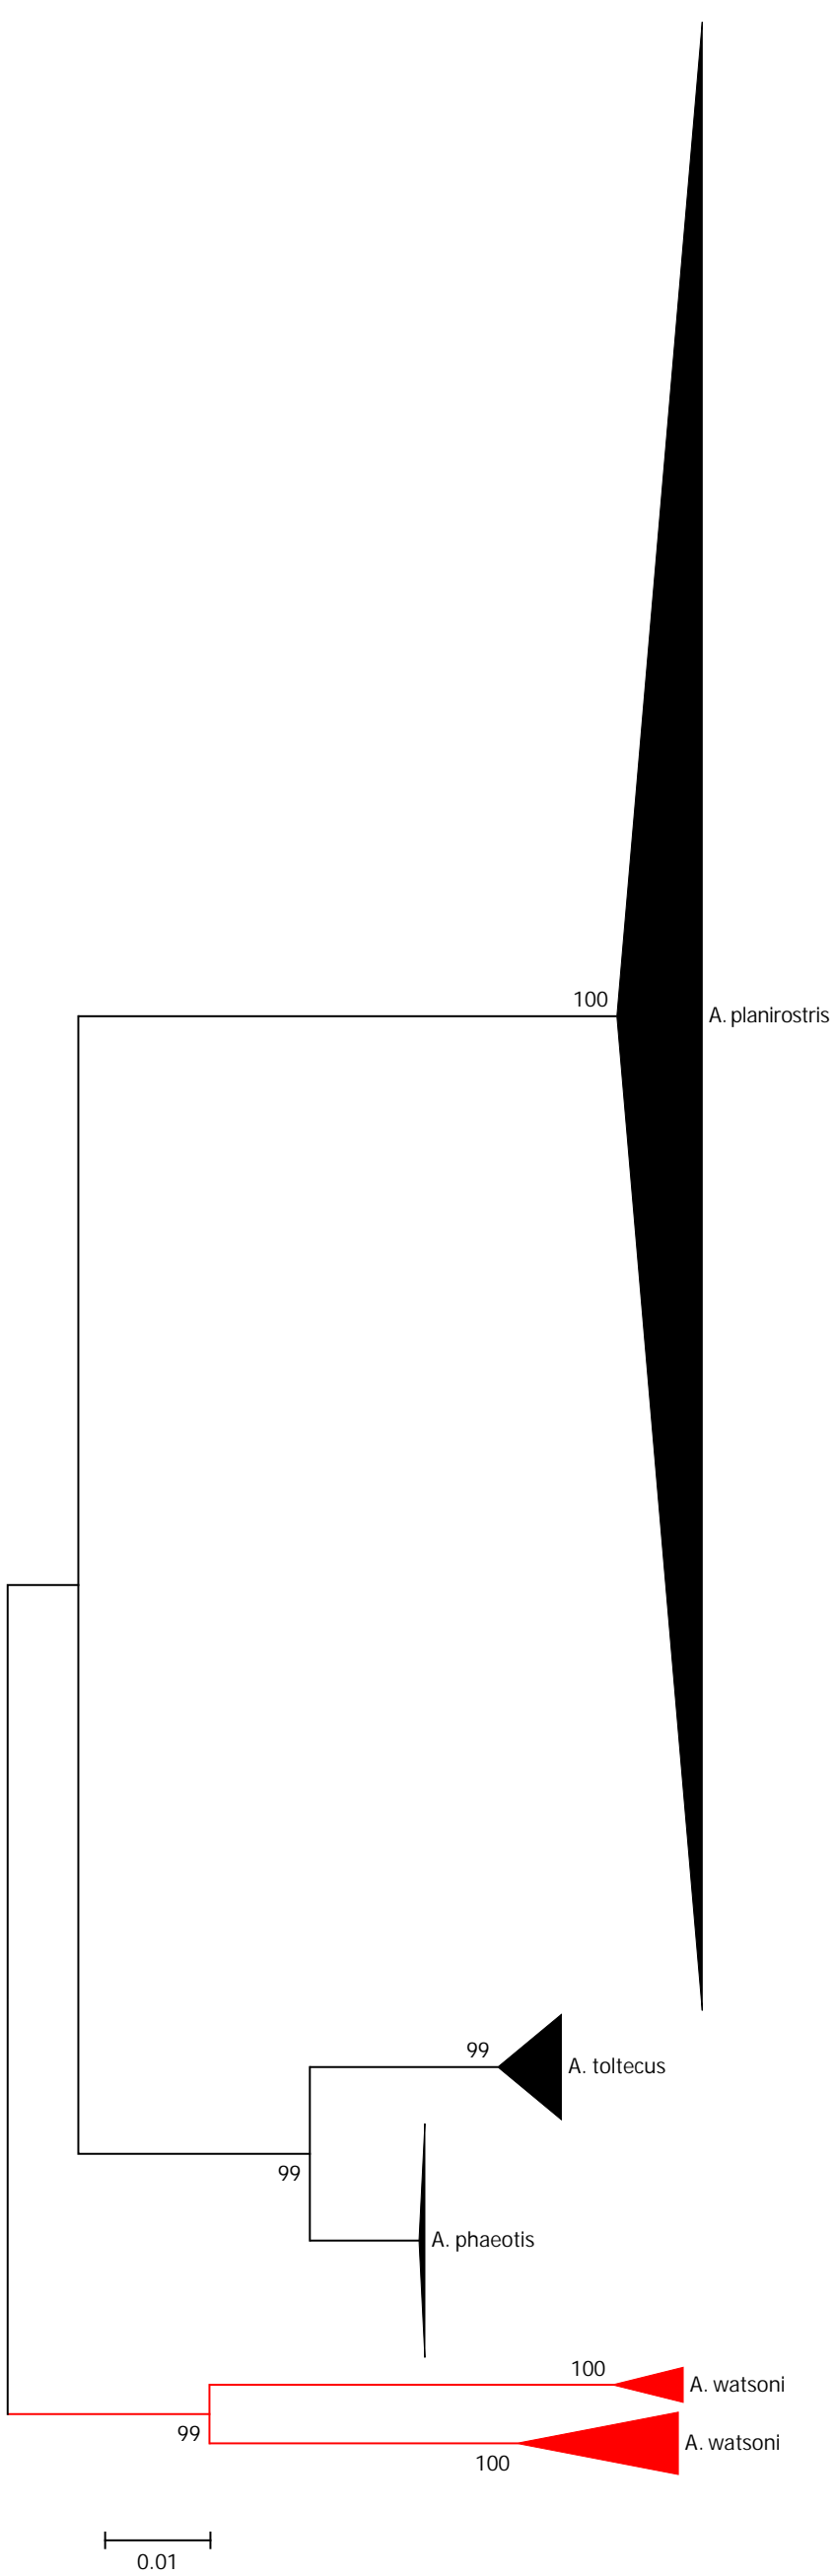

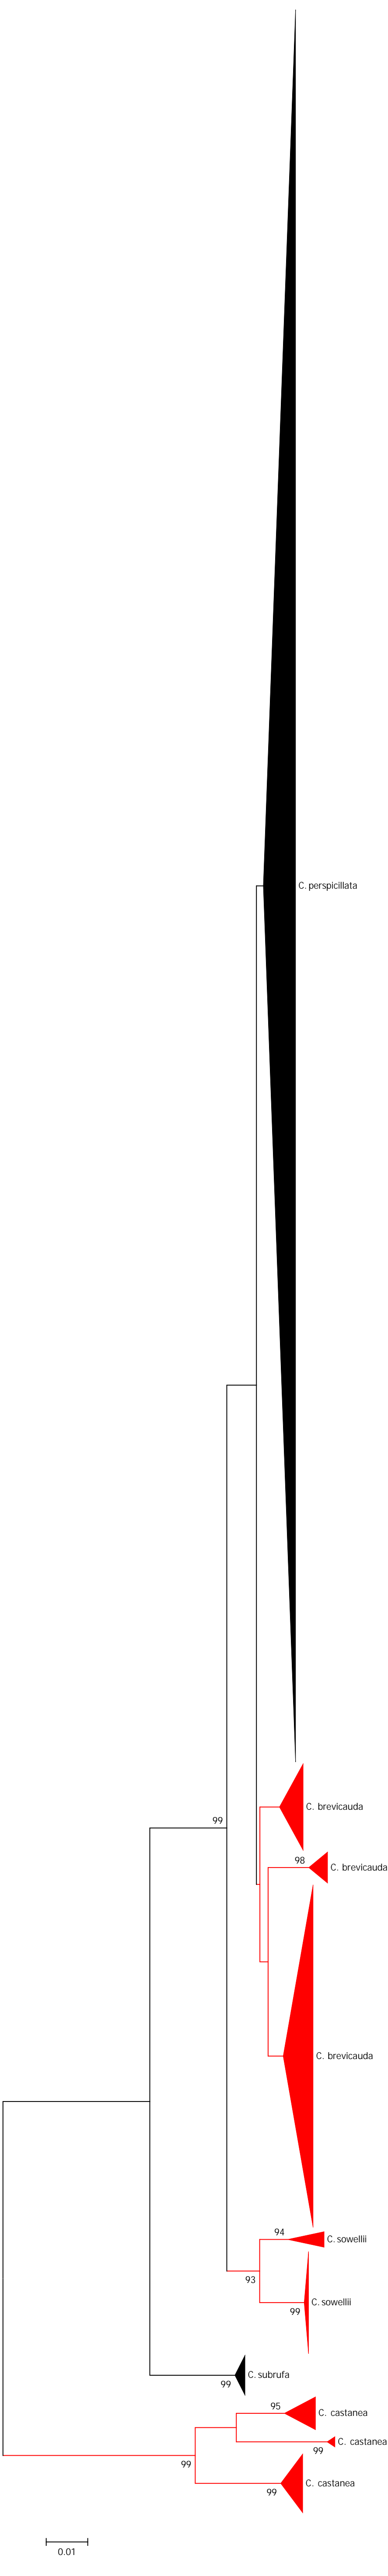





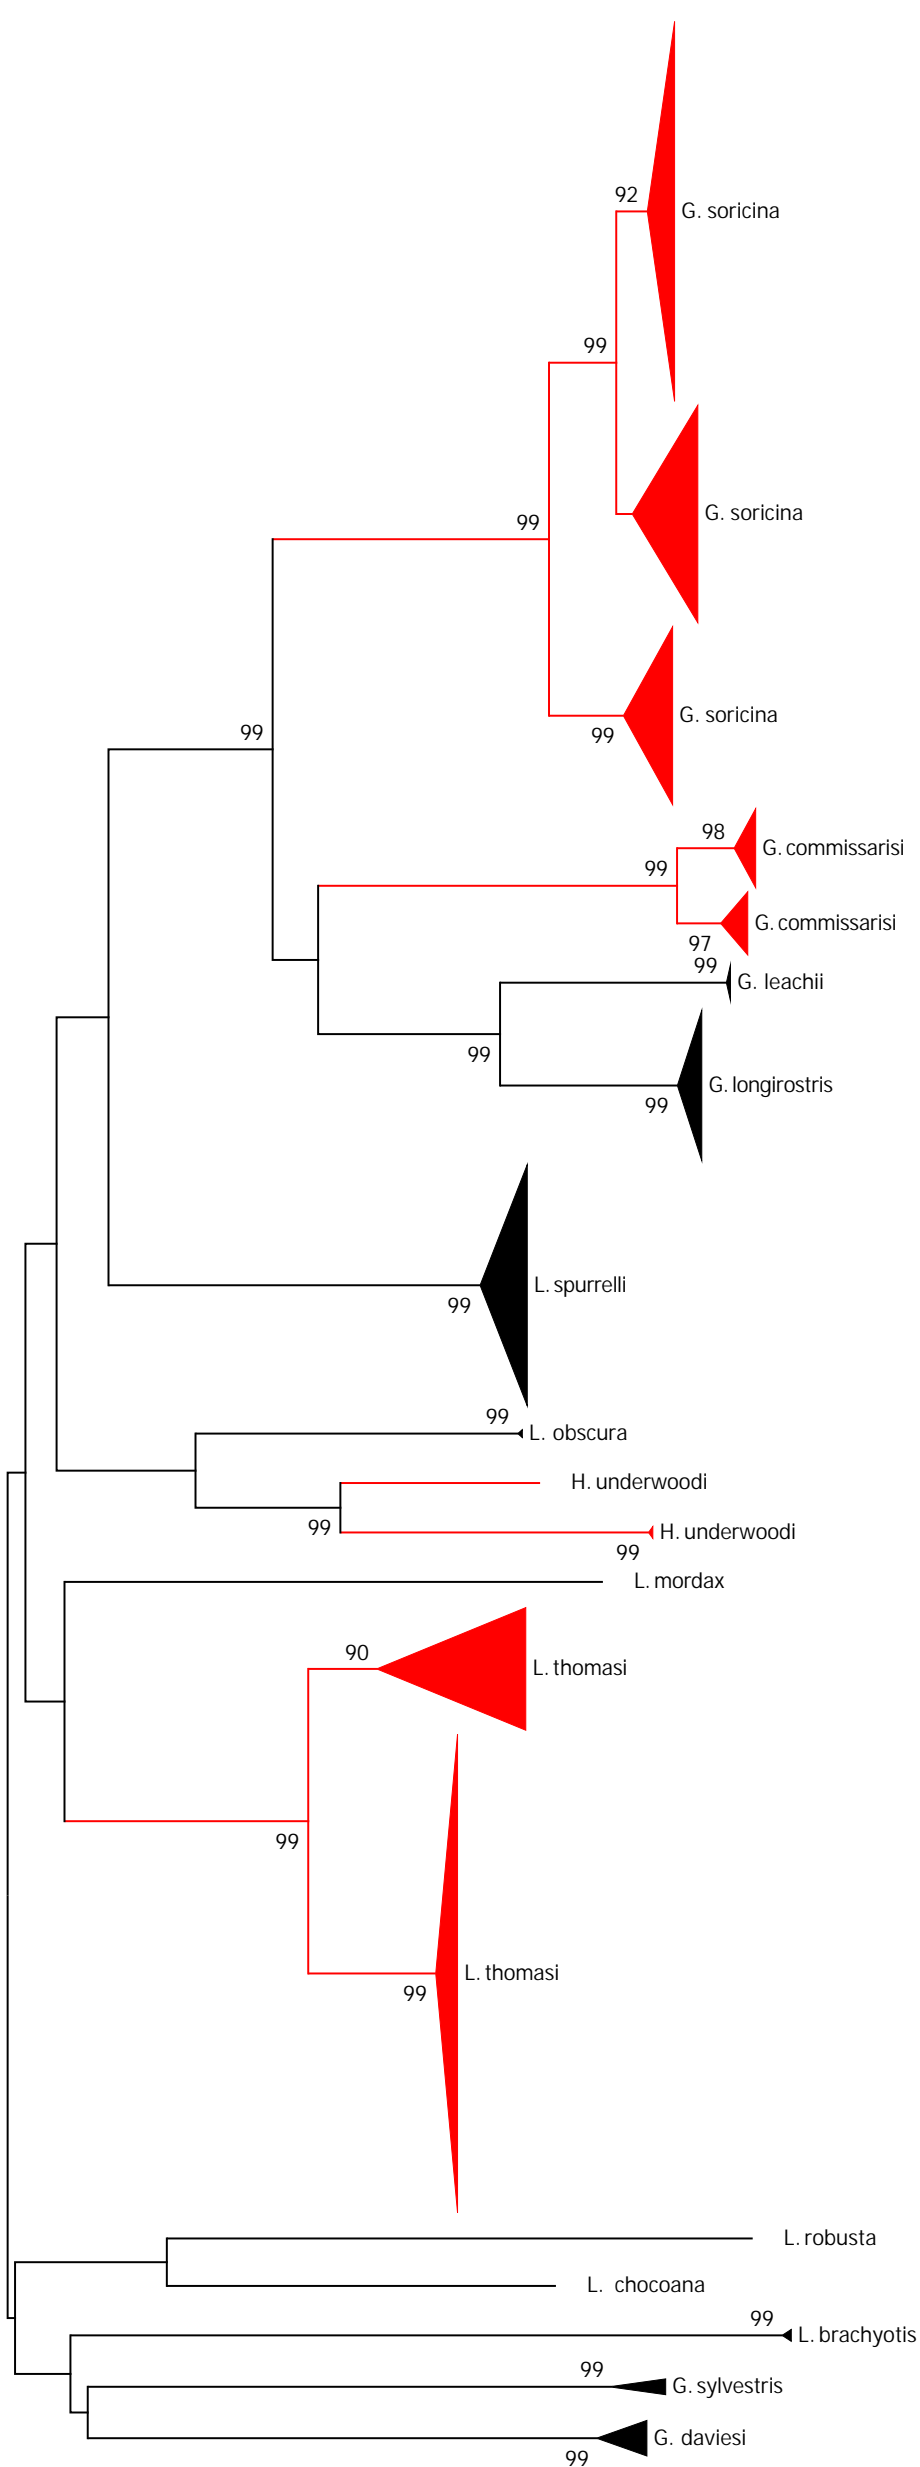

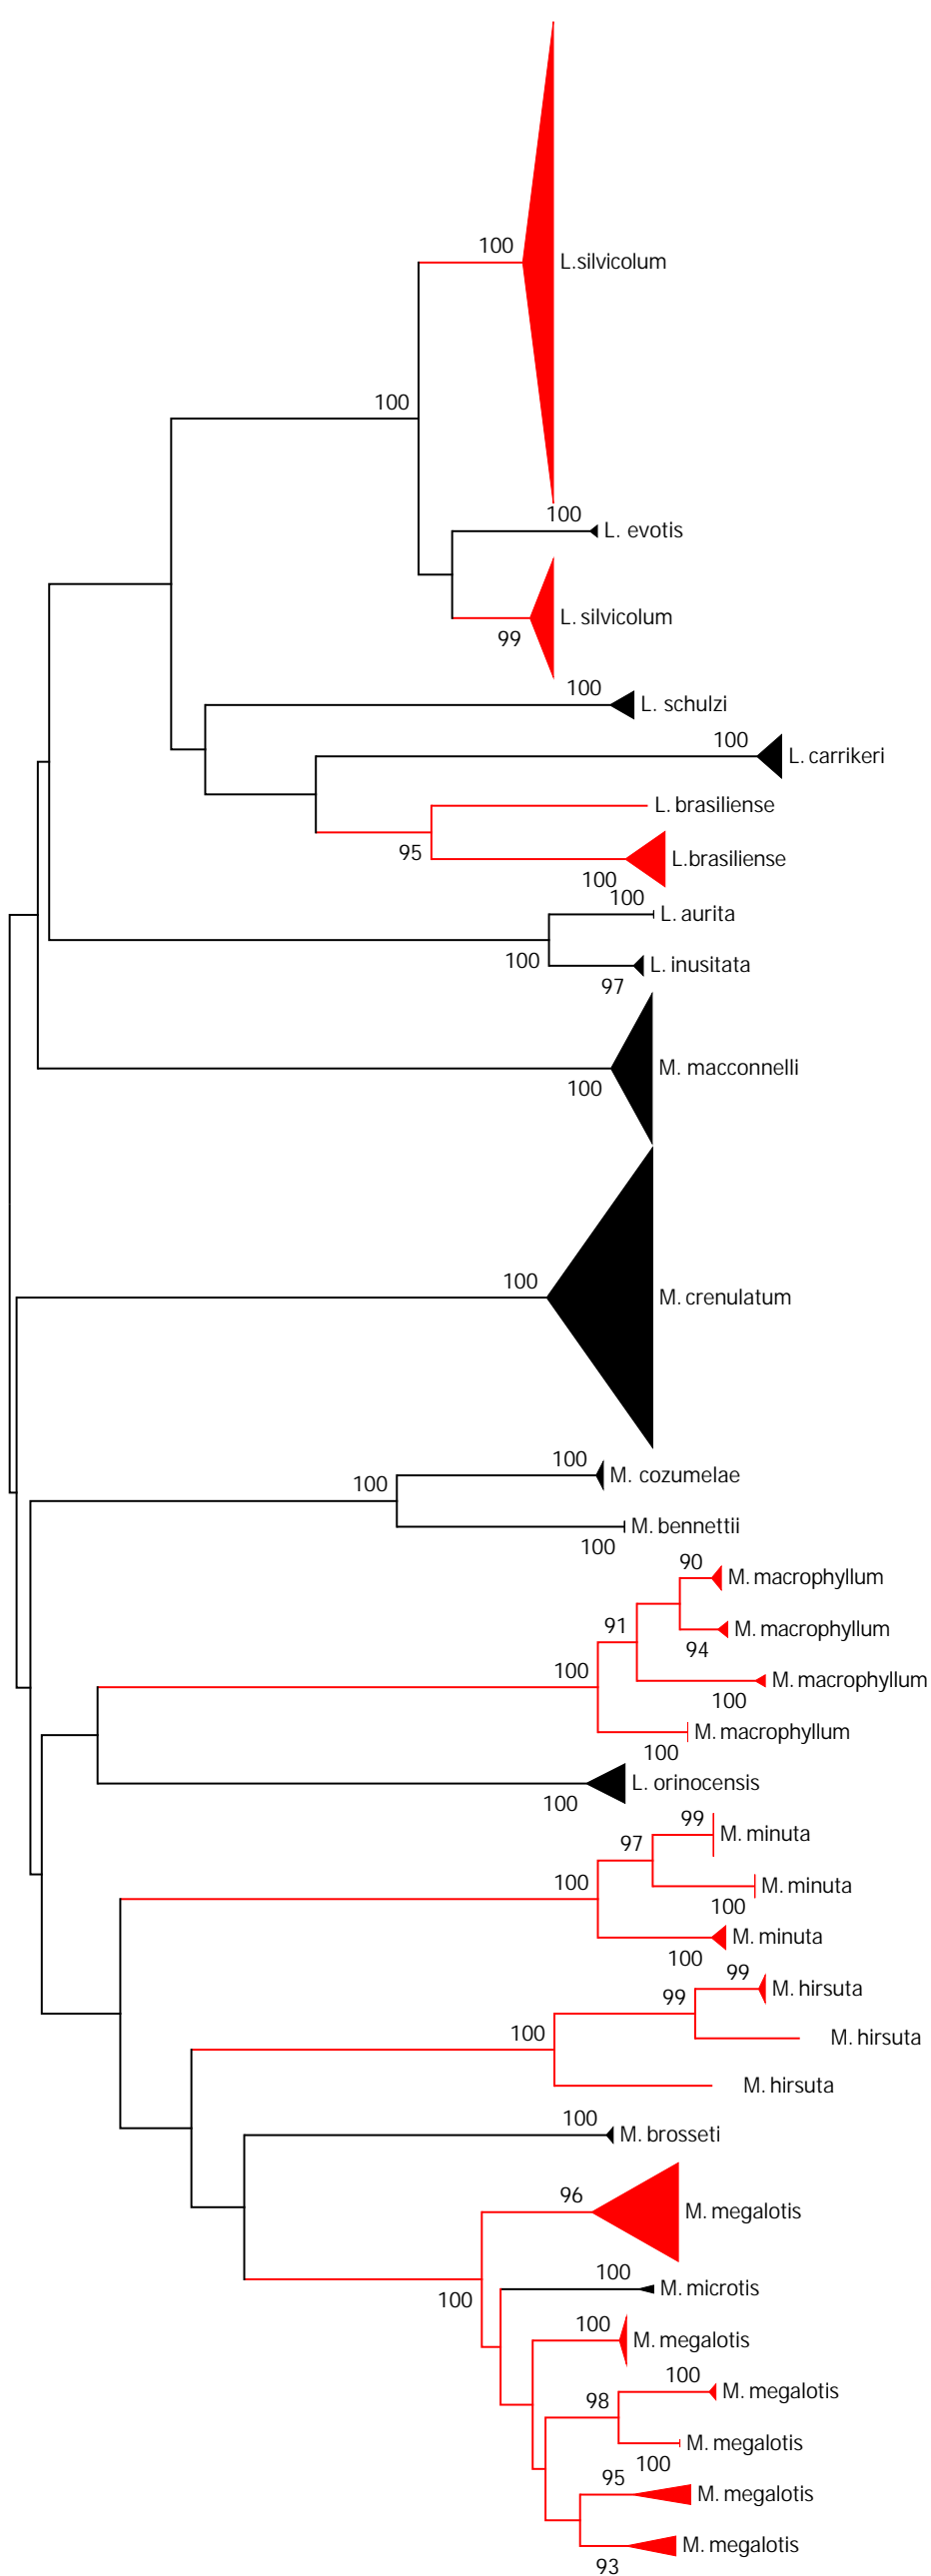

0.02

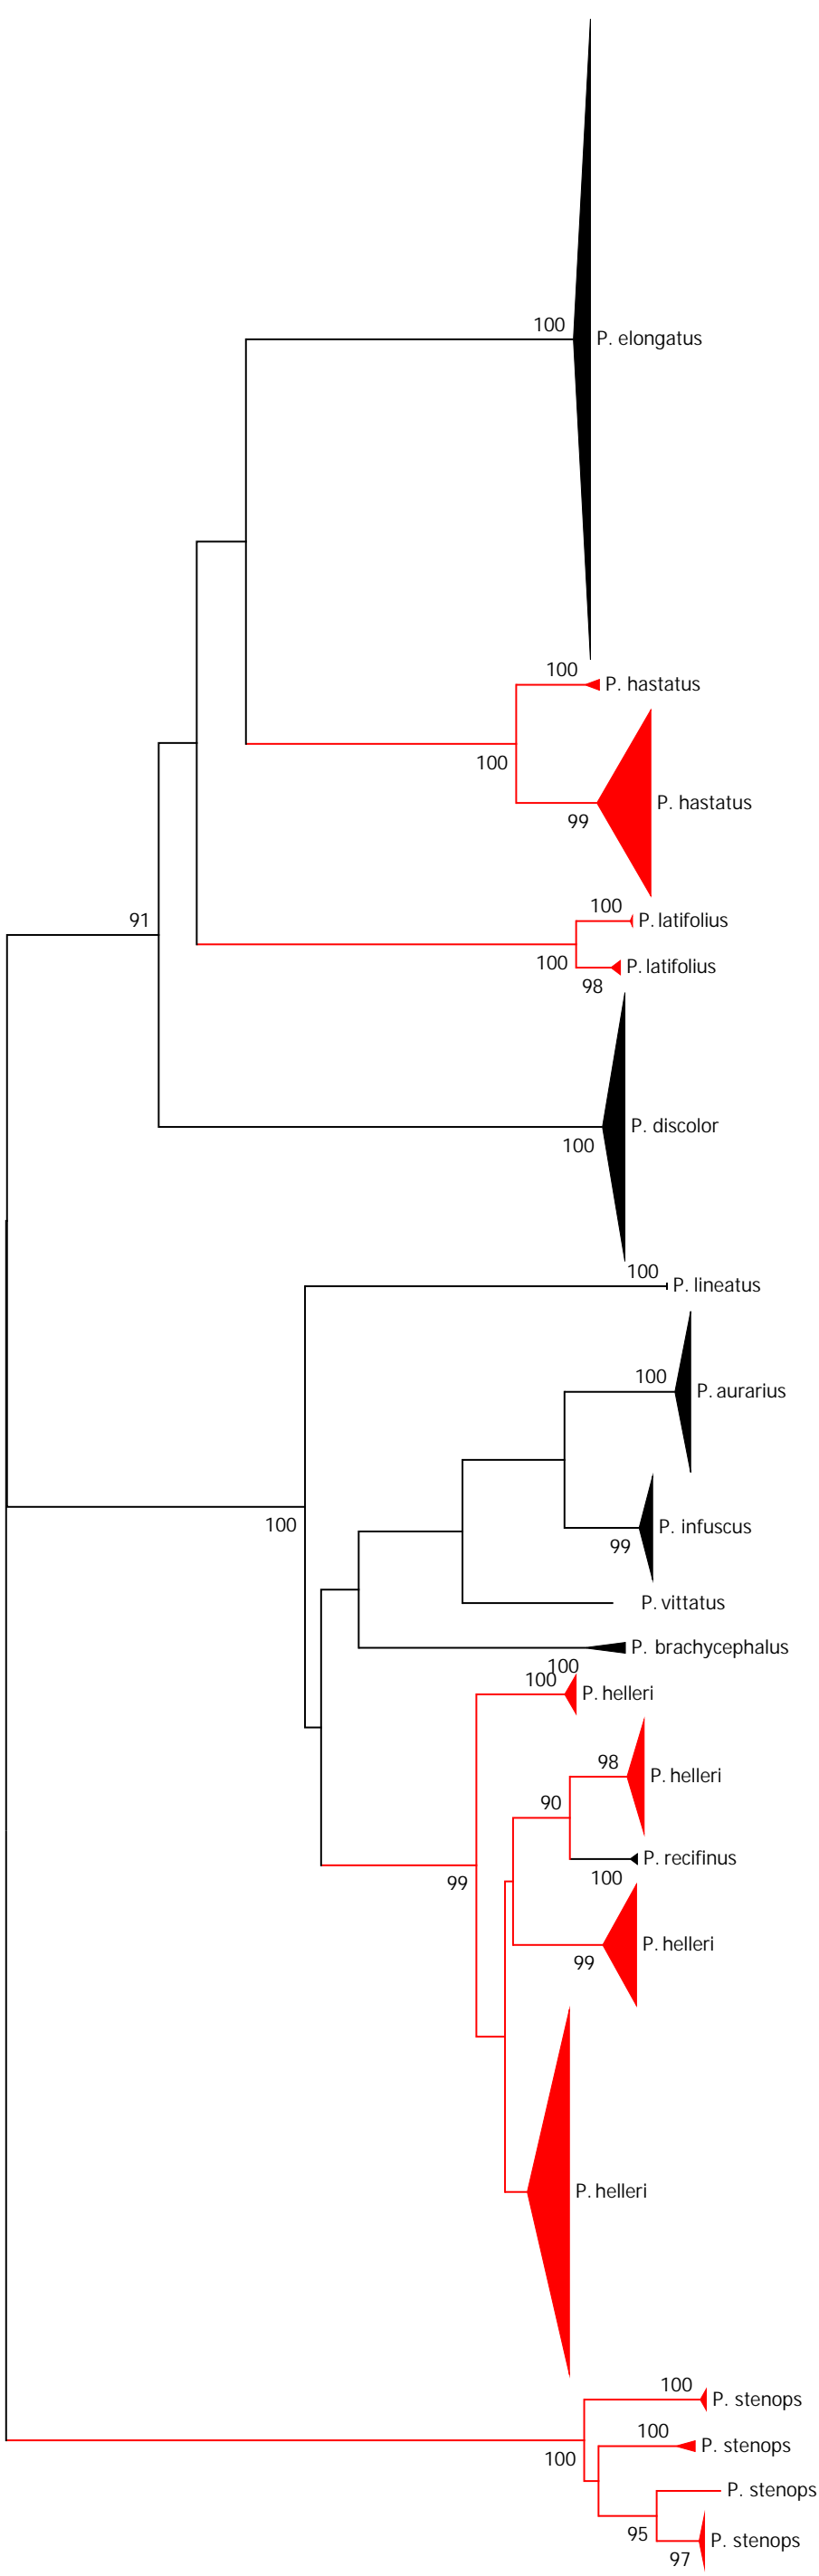

0.02

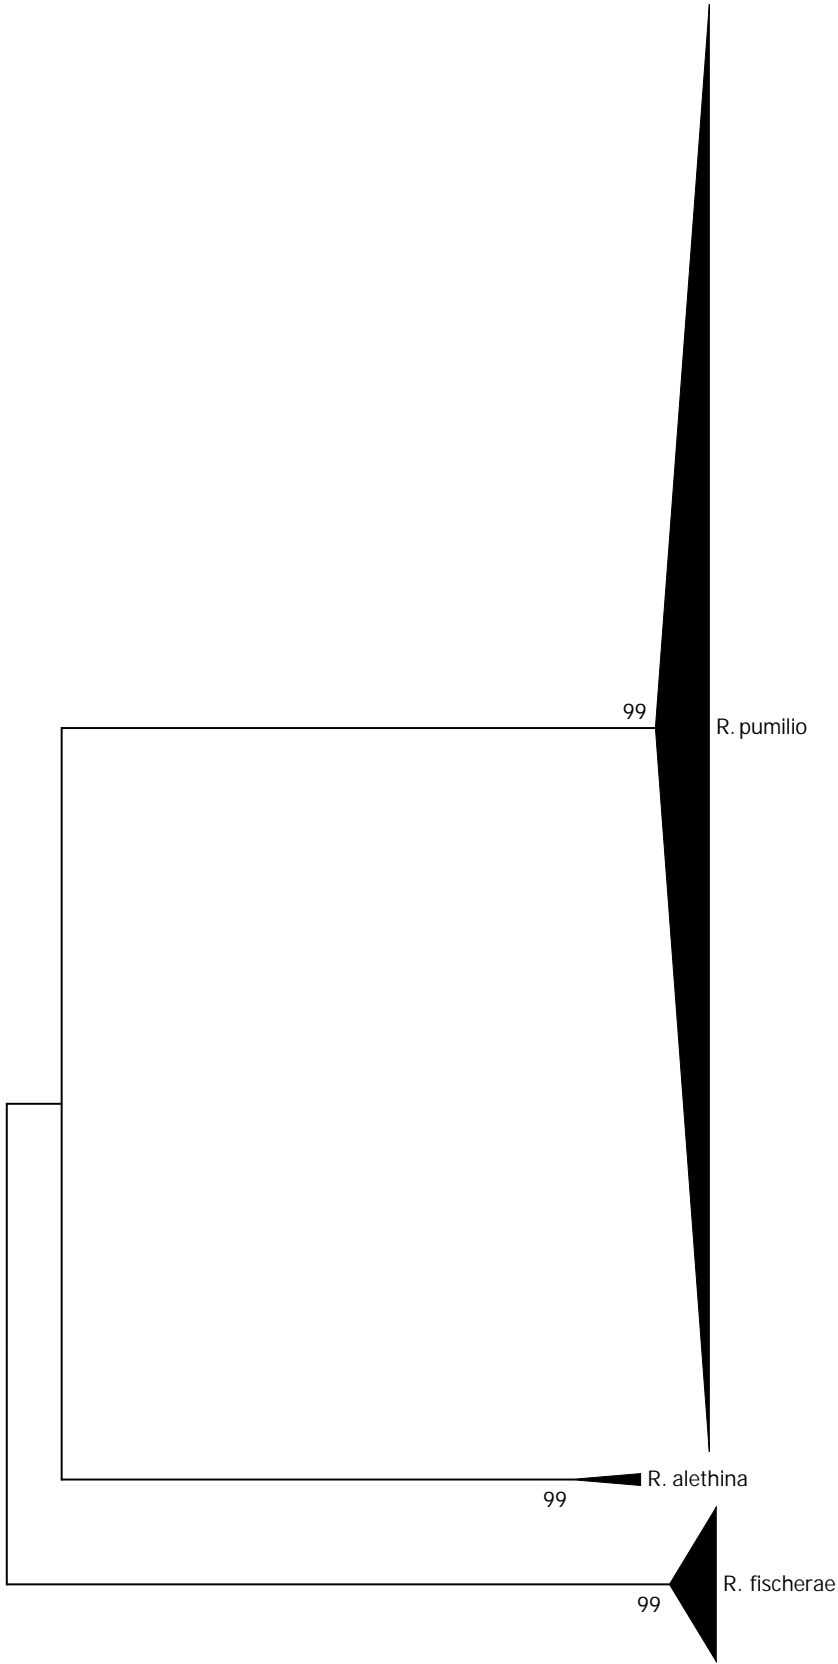

0.02

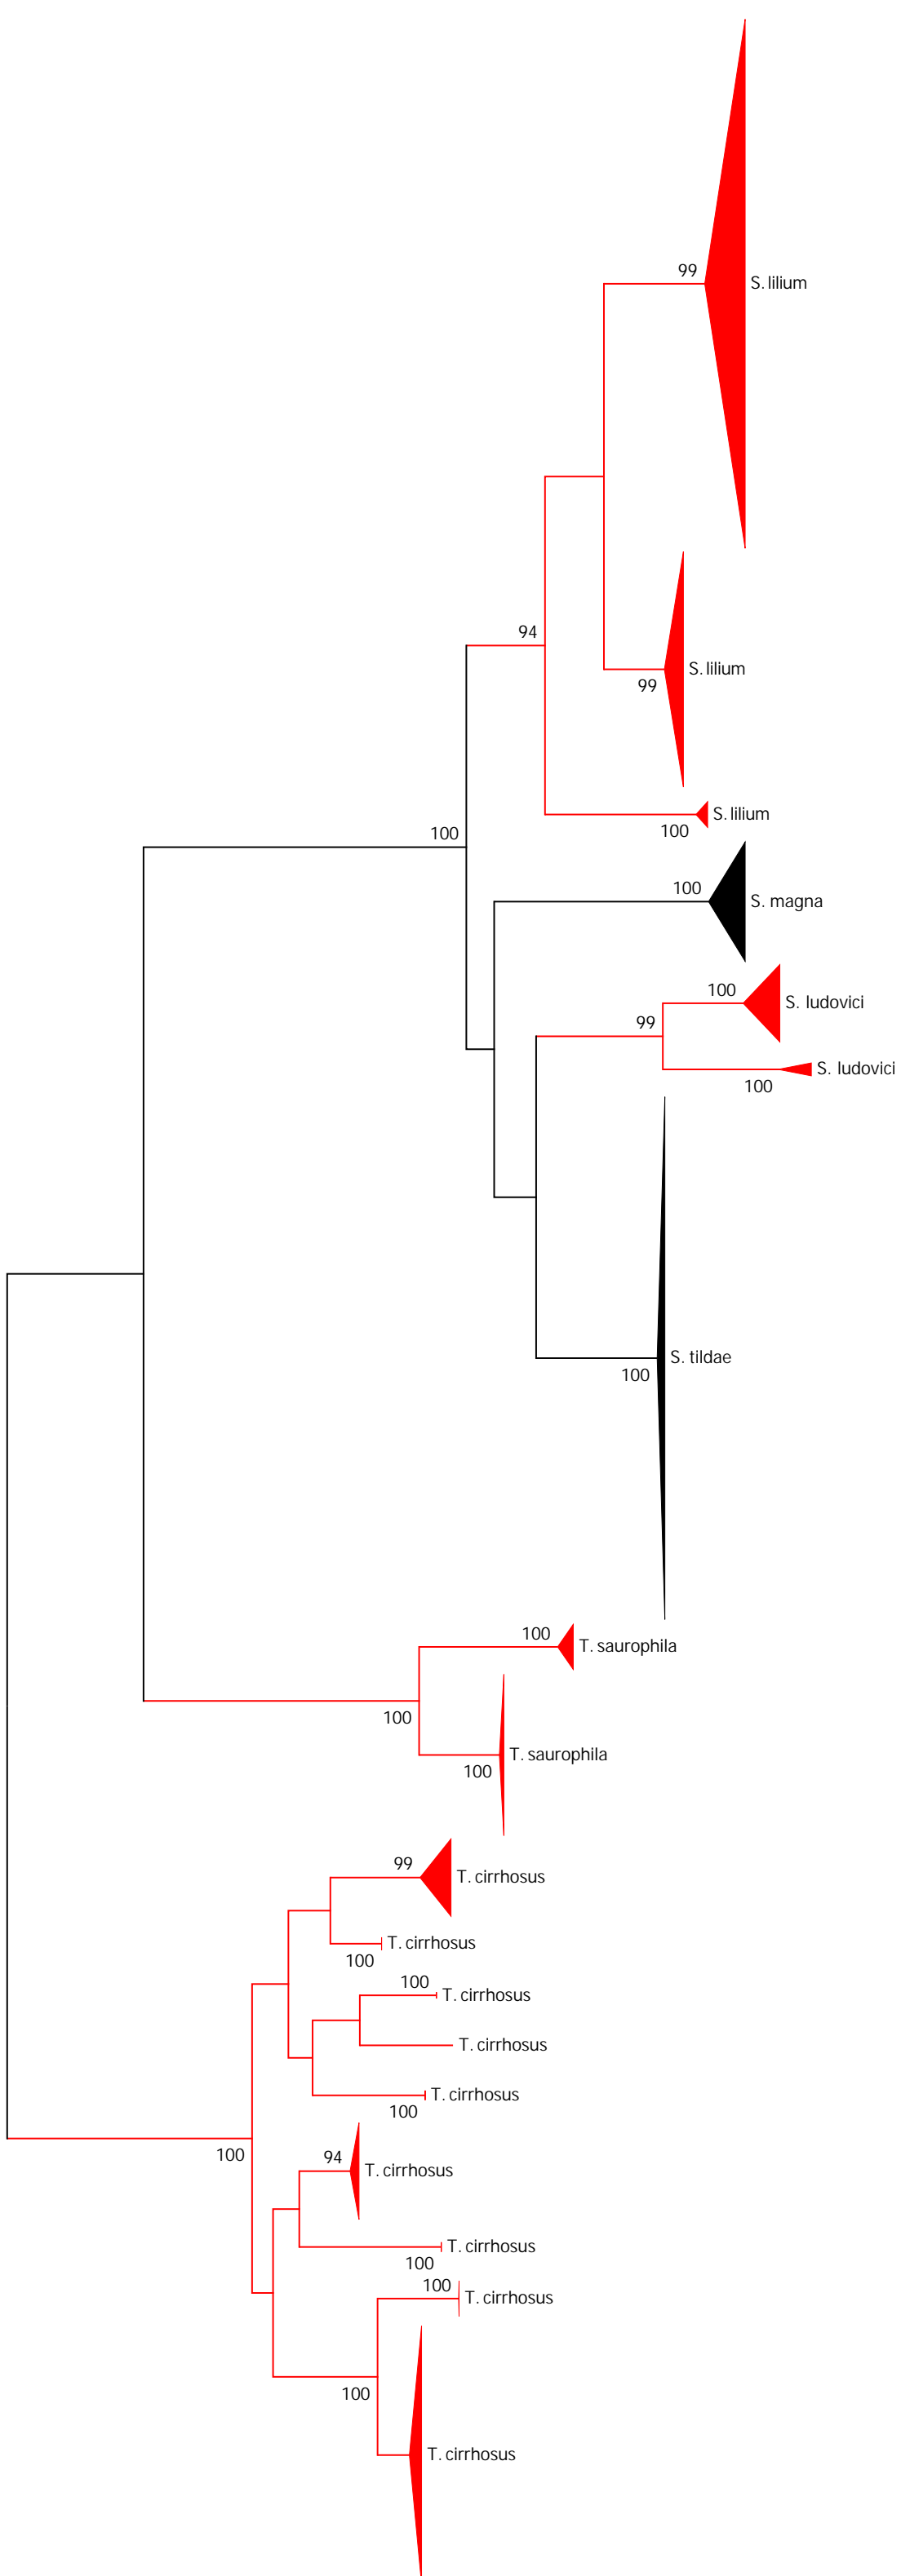

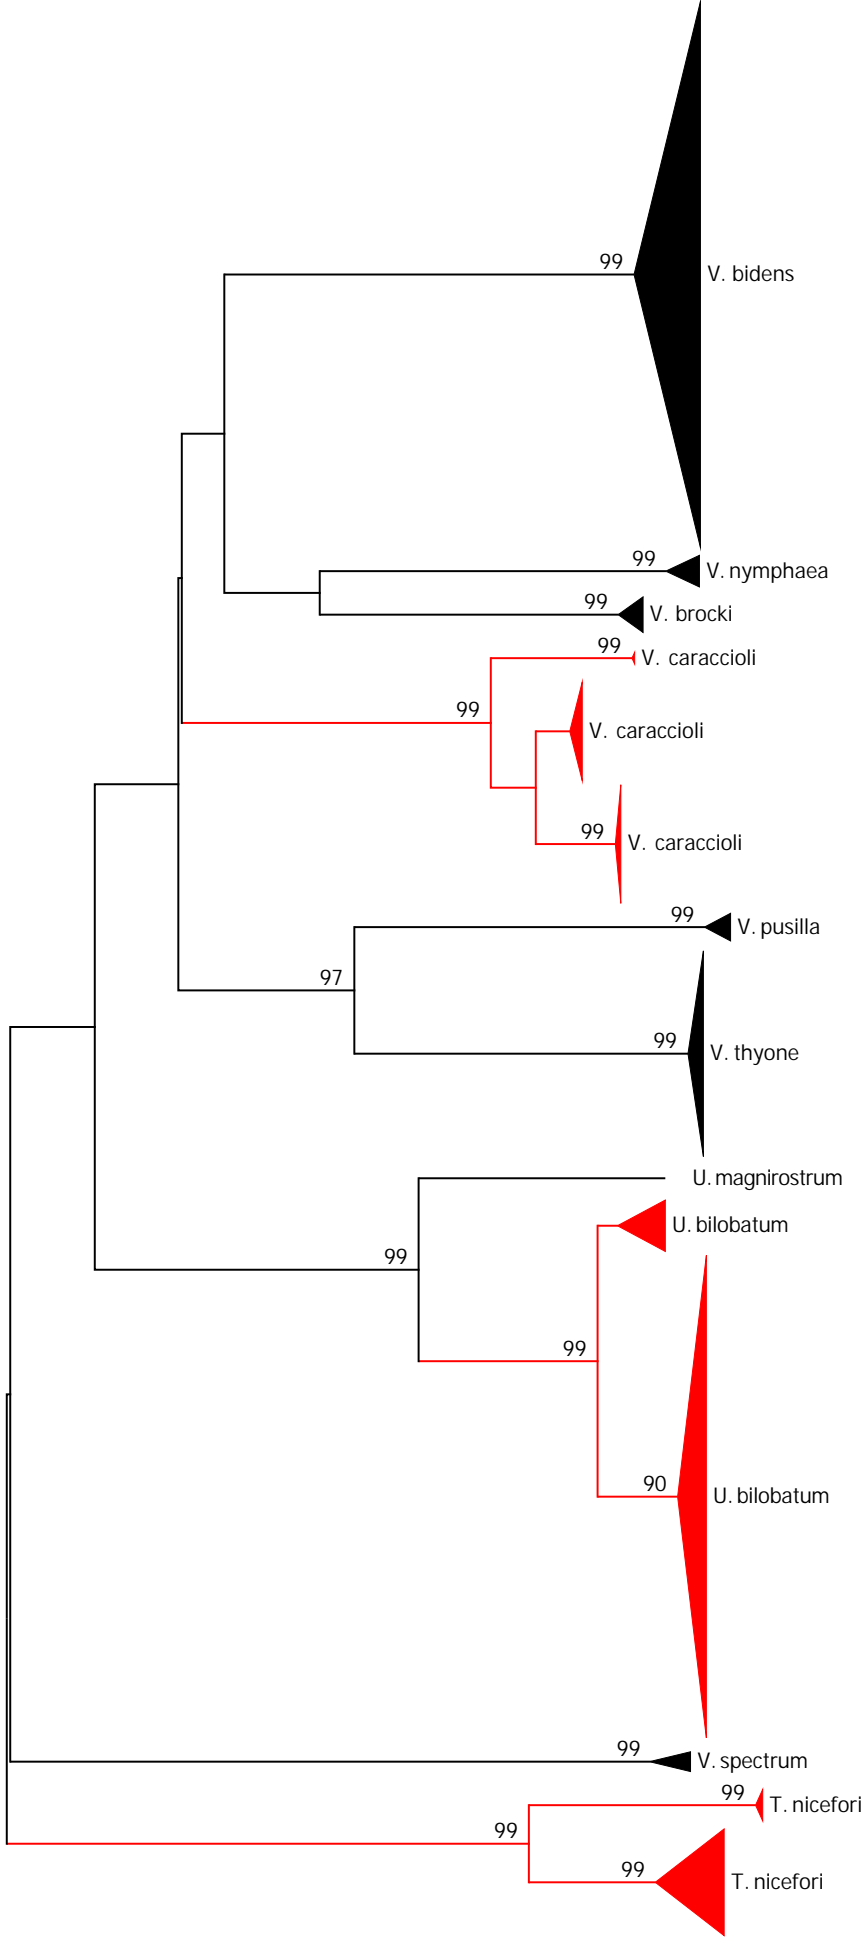

0.02

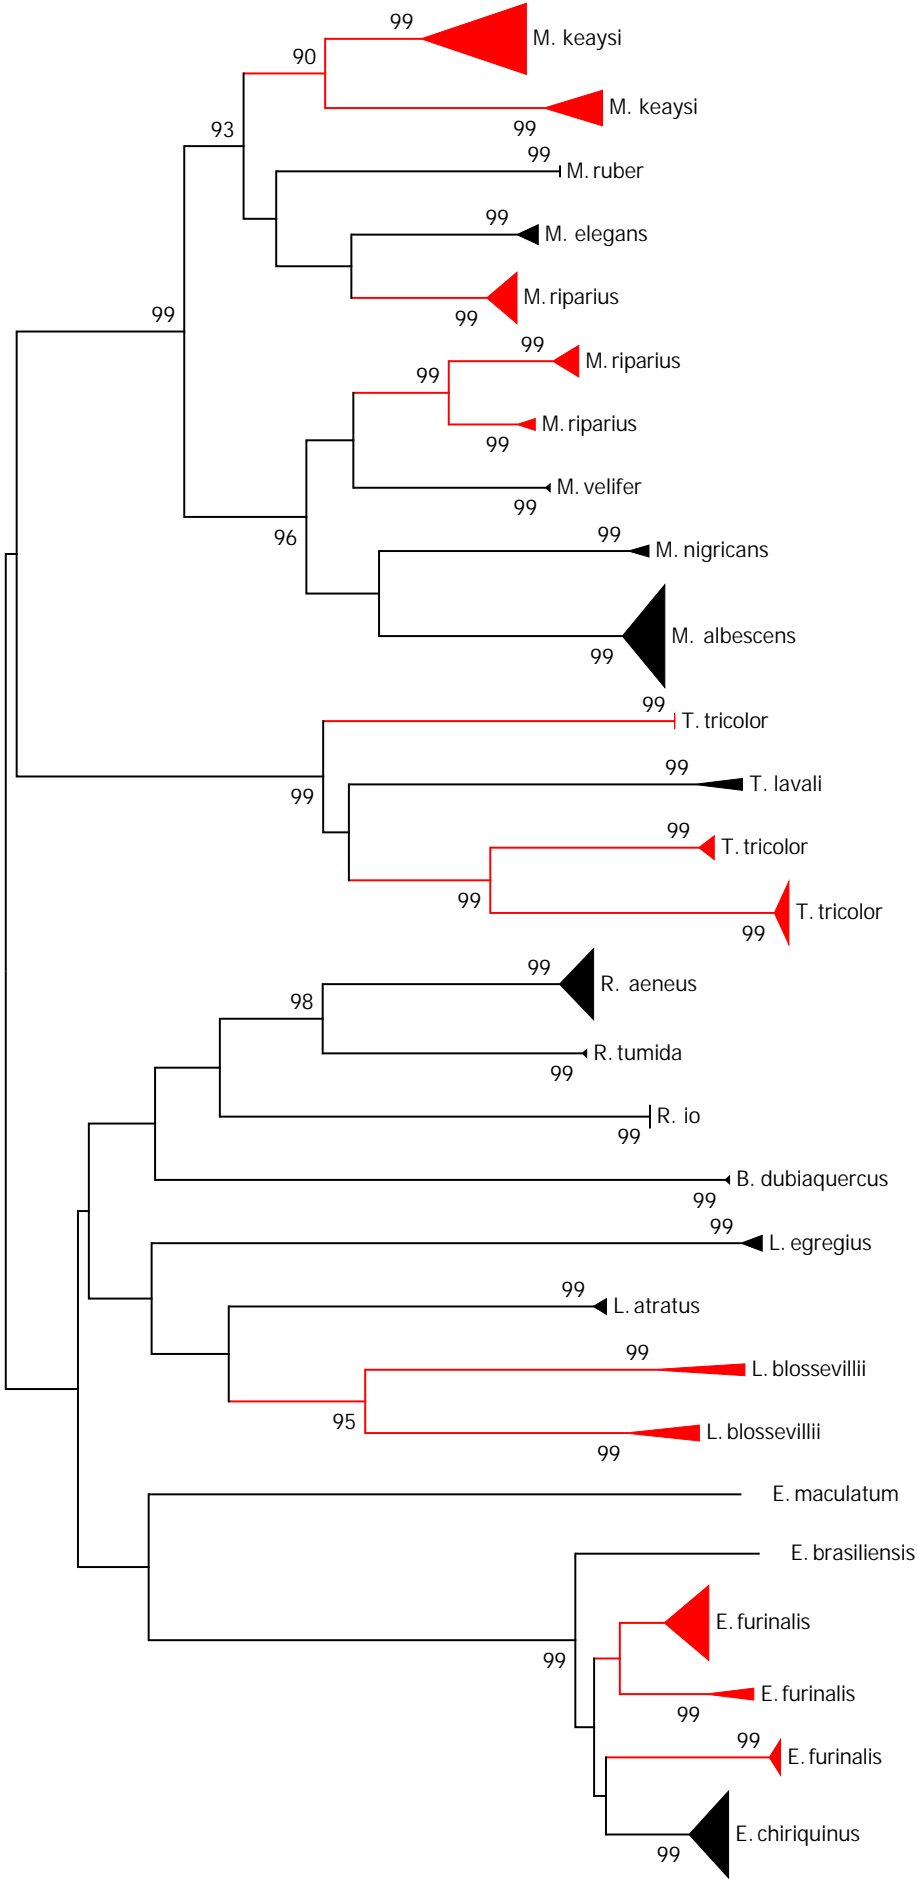

0.02
